# Supplementary material for: Metabolic Engineering and Adaptive Evolution for Efficient Production of l-Lactic Acid in Saccharomyces cerevisiae
Source: PubMed Central journal article supplement (PMC9769770; doi:10.1128/spectrum.02277-22), 2022-11-10
Supplement: spectrum.02277-22-s0001.pdf [file spectrum.02277-22-s0001.pdf]

## Supplemental material

### **Metabolic Engineering and Adaptive Evolution for Efficient Production of L-lactic acid in *Saccharomyces cerevisiae***

Pan Zhu<sup>a,c</sup>, Rui Luo<sup>a,b</sup>, Yize Li<sup>a,b</sup>, and Xiulai Chen<sup>a,b\*</sup>

<sup>a</sup> State Key Laboratory of Food Science and Technology, Jiangnan University, Wuxi 214122, China;

<sup>b</sup> Key Laboratory of Industrial Biotechnology, Ministry of Education, Jiangnan University, Wuxi 214122, China;

<sup>c</sup> State Key Laboratory of Membrane Biology, School of Life Sciences, Tsinghua University, Beijing 100084, China

\* Corresponding author at:

State Key Laboratory of Food Science and Technology, Jiangnan University, 1800 Lihu Road, Wuxi 214122, China. Tel:

+86-510-85197357; Fax: +86-510-85197875. *E-mail address*: xlchen@jiangnan.edu.cn (Xiulai Chen)

Table S1 Strains and plasmids used in this study.

| Strains and plasmids            | Relevant characteristics                                                                       | References |
|---------------------------------|------------------------------------------------------------------------------------------------|------------|
| <b>Strains</b>                  |                                                                                                |            |
| <i>S. cerevisiae</i> CEN.PK2-1C | <i>MATa ura3-52 leu3-5,112 trp1-289 his3Δ MAL2-8<sup>c</sup> SUC2</i>                          | EUROSCARF  |
| S.c-0                           | <i>S. cerevisiae</i> CEN.PK2-1C                                                                | EUROSCARF  |
| S.c-PΔ-L                        | <i>S. cerevisiae</i> CEN.PK2-1C <i>pdc1Δ::P<sub>PDC1</sub>-LcLDH-T::his</i>                    | This study |
| S.c-PΔ-B                        | <i>S. cerevisiae</i> CEN.PK2-1C <i>pdc1Δ::P<sub>PDC1</sub>-BoLDH-T::his</i>                    | This study |
| S.c-PΔ-R                        | <i>S. cerevisiae</i> CEN.PK2-1C <i>pdc1Δ::P<sub>PDC1</sub>-RoLDH-T::his</i>                    | This study |
| S.c-PΔΔ-B                       | S.c-PΔ-B <i>adh1Δ::leu</i>                                                                     | This study |
| S.c-PΔΔ-BE                      | S.c-PΔ-B <i>adh1Δ::P<sub>ADH1</sub>-eutE-T::leu</i>                                            | This study |
| S.c-NO.1                        | S.c-PΔΔ-BE (pY16)                                                                              | This study |
| S.c-NO.2                        | S.c-PΔΔ-BE (pY16-JEN1)                                                                         | This study |
| S.c-NO.3                        | S.c-PΔΔ-BE (pY16-ADY2)                                                                         | This study |
| S.c-NO.4                        | S.c-PΔΔ-BE (pY16-ESBP6)                                                                        | This study |
| S.c-NO.5                        | S.c-PΔΔ-BE (pY16-JEN1-ADY2)                                                                    | This study |
| S.c-NO.6                        | S.c-PΔΔ-BE (pY16-JEN1-ESBP6)                                                                   | This study |
| S.c-NO.7                        | S.c-PΔΔ-BE (pY16-ADY2-ESBP6)                                                                   | This study |
| S.c-NO.8                        | S.c-PΔΔ-BE (pY16-JEN1-ADY2-ESBP6)                                                              | This study |
| S.c-NO.2-100                    | the evolved S.c-NO.2                                                                           | This study |
| <b>Plasmids</b>                 |                                                                                                |            |
| pY16                            | CEN6/ARSH4, Amp, URA3, P <sub>TEF</sub>                                                        | Turbo      |
| pY16-JEN1                       | CEN6/ARSH4, Amp, URA3, P <sub>TEF</sub> -JEN1                                                  | This study |
| pY16-ADY2                       | CEN6/ARSH4, Amp, URA3, P <sub>TEF</sub> -ADY2                                                  | This study |
| pY16-ESBP6                      | CEN6/ARSH4, Amp, URA3, P <sub>TEF</sub> -ESBP6                                                 | This study |
| pY16-JEN1-ADY2                  | CEN6/ARSH4, Amp, URA3, P <sub>TEF</sub> -JEN1, P <sub>TEF</sub> -ADY2                          | This study |
| pY16-JEN1-ESBP6                 | CEN6/ARSH4, Amp, URA3, P <sub>TEF</sub> -JEN1, P <sub>TEF</sub> -ESBP6                         | This study |
| pY16-ADY2-ESBP6                 | CEN6/ARSH4, Amp, URA3, P <sub>TEF</sub> -ADY2, P <sub>TEF</sub> -ESBP6                         | This study |
| pY16-JEN1-ADY2-ESBP6            | CEN6/ARSH4, Amp, URA3, P <sub>TEF</sub> -JEN1, P <sub>TEF</sub> -ADY2, P <sub>TEF</sub> -ESBP6 | This study |
| pLAZ10-LDH                      | pLAZ10 with <i>LDH</i> gene from <i>Bovine</i>                                                 | (1)        |

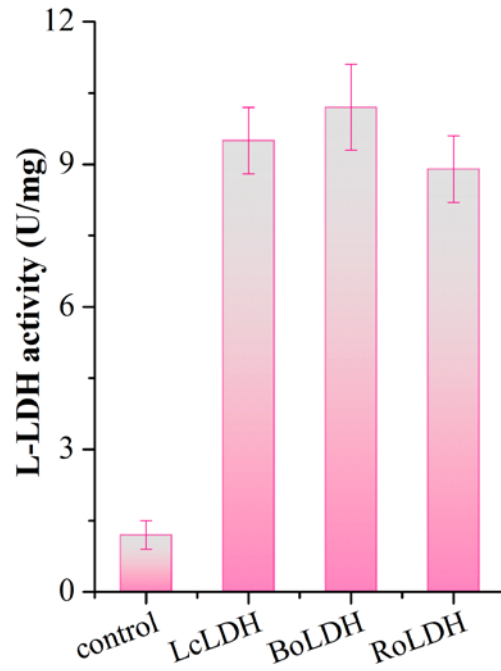

FIG S1 The specific activities of *LcLDH*, *BoLDH*, and *RoLDH* in the engineered *S. cerevisiae*, S.c-P $\Delta$ -L, S.c-P $\Delta$ -B, and S.c-P $\Delta$ -R, respectively.

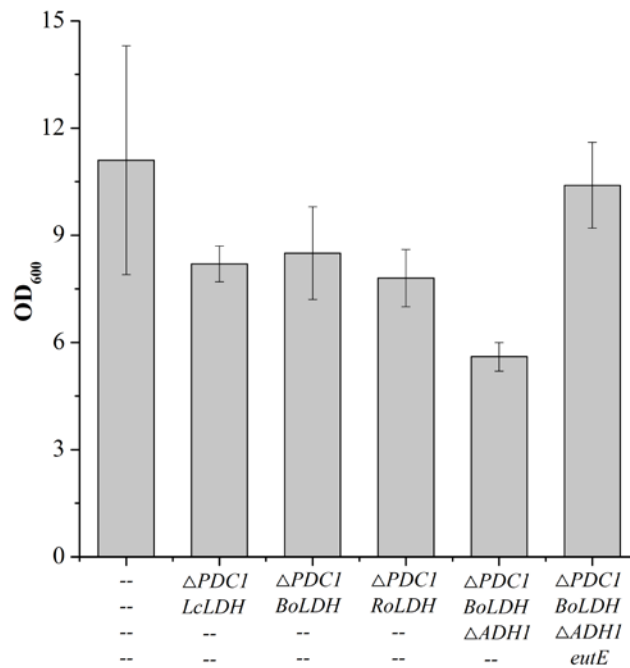

FIG S2 Effect of gene expression or deletion on cell growth.

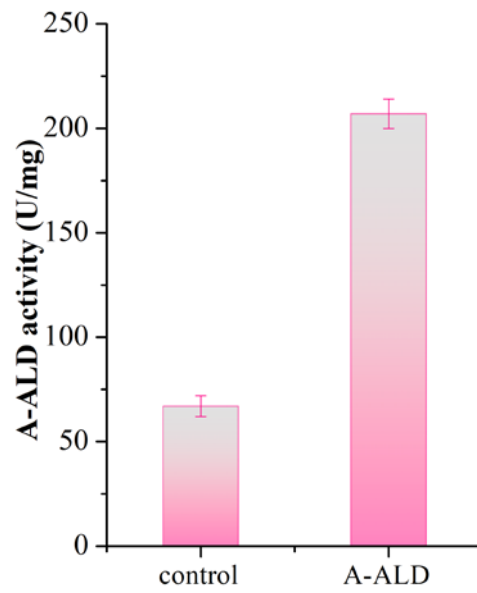

FIG S3 The specific activities of A-ALD in the engineered strain S.c-P $\Delta\Delta\Delta$ -BE and the control strain S.c-P $\Delta\Delta\Delta$ -B.

## References

1. **Bianchi MM, Brambilla L, Protani F, Liu CL, Lievens J, Porro D.** 2001. Efficient homolactic fermentation by *Kluyveromyces lactis* strains defective in pyruvate utilization and transformed with the heterologous LDH gene. *Appl Environ Microbiol* **67**:5621-5625.
